# Supplementary material
Source: publisher figshare collection journal article supplement (https://acs.figshare.com/ndownloader/files/4082689)
Supplement: Supplementary file 1 [file 4082689]

**Supplemental Figure 1.**

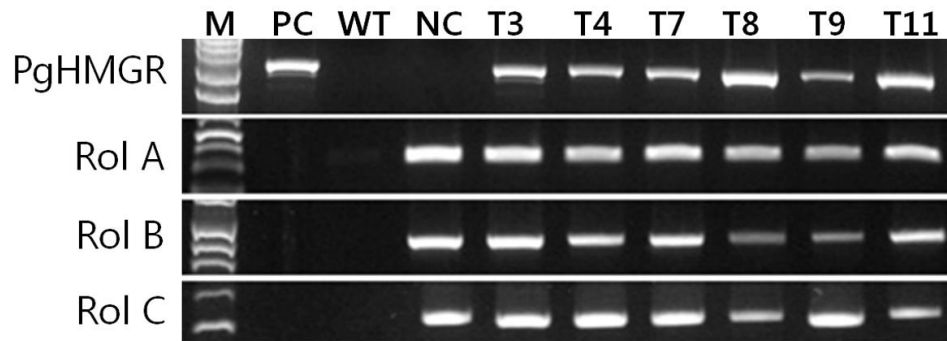

**Supplemental Figure 1.** PCR analysis of PgHMGR overexpression lines. PC-Positive control (plasmid), WT-Wild type root, NC-Negative control (pBI121-GUS), Tn-PgHMGR overexpression line.
